# Supplementary material
Source: Springer Nature journal article supplement (https://www.springermedizin.de/resource/supplementary/12889_2008_1139_MOESM2_ESM.pdf/9502536)
Supplement: MOESM2 [file 9502536]

Women who delivered in  
ANRS 1201/1202 DITRAME  
PLUS  
N = 729

Pregnancy outcomes  
N = 767

Stillbirths  
(N = 13)

HIV-infected children  
(N = 61)

2<sup>nd</sup> or 3<sup>rd</sup> from  
multiple birth  
and infected  
(N = 1)

Postnatal  
infection or  
timing  
unknown  
(N = 15)

Peripartum infected  
children  
(N = 45)

Women who delivered in  
ANRS 049a DITRAME and its  
open cohort  
N = 374

Pregnancy outcomes  
N = 379

Stillbirths  
(N = 7)

HIV-infected children  
(N = 80)

2<sup>nd</sup> or 3<sup>rd</sup> from  
multiple birth  
and infected  
(N = 1)

Postnatal  
infection or  
timing  
unknown  
(N = 26)

Peripartum infected  
children  
(N = 53)
